# Supplementary material
Source: PubMed Central journal article supplement (PMC11477821)
Supplement: ajcr0014-4337-f8.pdf [file ajcr0014-4337-f8.pdf]

# NR4A2-HuR axis is a novel target for treating pancreatic cancer

**Supplementary Table 1.** Sources of oligonucleotides

| A. Sources of siRNAs (life technologies) |         |
|------------------------------------------|---------|
| siRNA oligos                             | Catalog |
| siNR4A2                                  | s9787   |
| siELAVL1/HuR                             | s4609   |
| siSp1                                    | s13319  |
| siSp3                                    | s13325  |
| siSp4                                    | s13327  |
| siCTRL                                   | AM4635  |

| B. ChIP primers                |                                |
|--------------------------------|--------------------------------|
| IDH1                           | HuR                            |
| ChIP F1: GAGCAAGGCCCTGTCTTAAA  | ChIP F1: GCAAGACCTCATCGCTACAA  |
| ChIP R1: GTTACCTGCCGGGATGATATG | ChIP R1: CTCCCAAAGAGCTGGGATTAC |
| ChIP F2: TGGAAAATCGAGGGGTGGAA  | ChIP F2: CATCCAGGTGAGGCGGTG    |
| ChIP R2: TATCACCCGTCCTATGGCC   | ChIP R2: GTAGCTGGCCCCACTCTC    |
| ChIP Primer 1:                 | ChIP Primer1:                  |
| Forward: GAGCAAGGCCCTGTCTTAAA  | Forward: GCAAGACCTCATCGCTACAA  |
| Reverse: GTTACCTGCCGGGATGATATG | Reverse: CTCCCAAAGAGCTGGGATTAC |

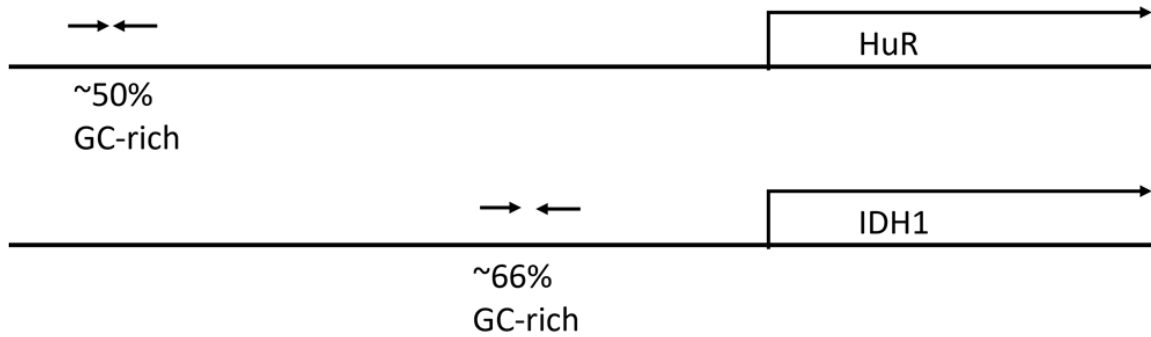

| C. RT-PCR primers (life sciences) |                                                                   |
|-----------------------------------|-------------------------------------------------------------------|
| NR4A2                             | Forward: CGACATTCTGCCTTCTCC<br>Reverse: GGTAAGTGTCCAGGAAAAG       |
| IDH1                              | Forward: CTATGATGGTGACGTGCAGTG<br>Reverse: CCTCTGCTTCTACTGTCTTGCC |
| HuR                               | Forward: AACGCCTCCTCCGGCTGGTG<br>Reverse: GCG GTA GCC GTTCAGGCTGG |

NR4A2-HuR axis is a novel target for treating pancreatic cancer

A

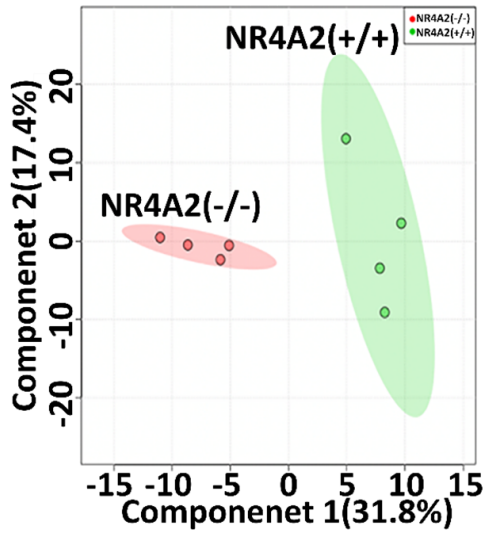

B

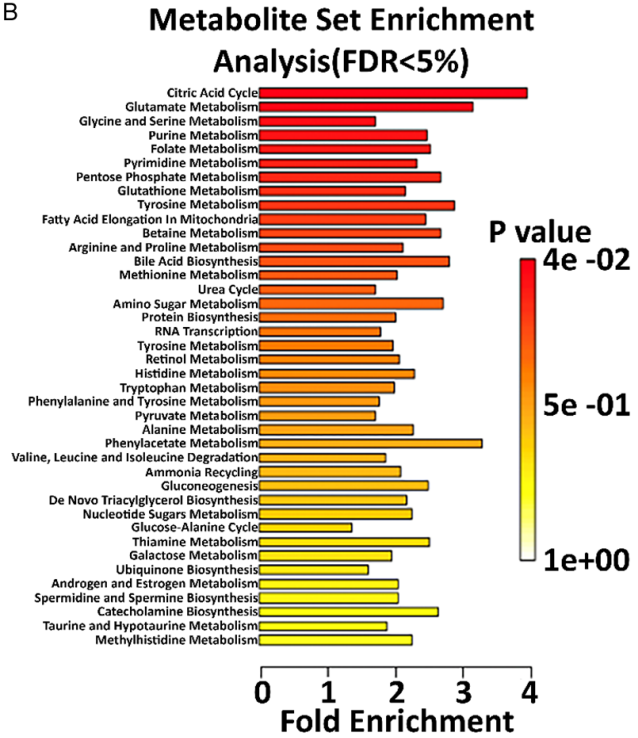

**Supplementary Figure 1.** NR4A2 knockout induces alterations in multiple genes and pathways in MiaPaCa2 cells. A. Partial least squares discriminant analysis (PLS-DA) plot analyzed by LC-MS/MS performed on NR4A2<sup>(+/+)</sup> and NR4A2<sup>(-/-)</sup> cells. B. Metabolite set enrichment analysis in NR4A2 knockout MiaPaCa2 cells.
